# Supplementary material
Source: PubMed Central journal article supplement (PMC5553310)
Supplement: NIHMS890976-supplement-Supp_Figures.pdf [file NIHMS890976-supplement-Supp_Figures.pdf]

**Supplementary Table 1****Shortened 3'UTRs**

| <b>APA site</b> | <b>gene ID</b> | <b>lost PUM sites</b> | <b>log fold change</b> | <b>-value diff. exp</b> | <b>gene symbol</b> |
|-----------------|----------------|-----------------------|------------------------|-------------------------|--------------------|
| p.1301.6        | 1301           | 1                     | 3.34604                | 1.20E-05                | COL11A1            |
| p.81611.1       | 81611          | 1                     | 1.84336                | 0.000678749             | ANP32E             |
| p.10097.1       | 10097          | 1                     | 1.76786                | 3.37E-05                | ACTR2              |
| p.51026.1       | 51026          | 1                     | 1.74004                | 9.13E-06                | GOLT1B             |
| p.51659.1       | 51659          | 1                     | 1.59379                | 6.14E-05                | GIN52              |
| p.79572.1       | 79572          | 1                     | 1.59155                | 0.00035399              | ATP13A3            |
| p.5062.1        | 5062           | 2                     | 1.49865                | 8.96E-05                | PAK2               |
| p.4893.2        | 4893           | 1                     | 1.48177                | 0.002016624             | NRAS               |
| p.8507.1        | 8507           | 1                     | 1.37817                | 0.007869441             | ENC1               |
| p.10276.2       | 10276          | 2                     | 1.37096                | 0.00099952              | NET1               |
| p.9877.1        | 9877           | 2                     | 1.33103                | 4.95E-06                | ZC3H11A            |
| p.80155.1       | 80155          | 1                     | 1.31275                | 4.48E-07                | NAA15              |
| p.55706.1       | 55706          | 1                     | 1.31015                | 0.000572818             | TMEM48             |
| p.92140.2       | 92140          | 3                     | 1.30391                | 4.98E-06                | MTDH               |
| p.25932.1       | 25932          | 2                     | 1.30381                | 0.00644907              | CLIC4              |
| p.528.3         | 528            | 1                     | 1.29909                | 0.000144482             | ATP6V1C1           |
| p.84955.2       | 84955          | 2                     | 1.27068                | 4.94E-05                | NUDCD1             |
| p.8543.1        | 8543           | 1                     | 1.26135                | 0.019855937             | LMO4               |
| p.55284.1       | 55284          | 1                     | 1.24239                | 6.14E-07                | UBE2W              |
| p.117178.3      | 117178         | 1                     | 1.23431                | 9.53E-05                | SSX2IP             |
| p.51018.4       | 51018          | 1                     | 1.22593                | 2.35E-06                | RRP15              |
| p.57532.6       | 57532          | 3                     | 1.22504                | 1.72E-05                | NUFIP2             |
| p.112858.2      | 112858         | 1                     | 1.18547                | 7.93E-05                | TP53RK             |
| p.8669.2        | 8669           | 1                     | 1.1763                 | 5.05E-06                | EIF3J              |
| p.10890.4       | 10890          | 1                     | 1.09651                | 9.14E-08                | RAB10              |
| p.3267.1        | 3267           | 1                     | 1.09645                | 4.22E-06                | AGFG1              |
| p.6745.2        | 6745           | 1                     | 1.0902                 | 0.000747828             | SSR1               |
| p.79677.2       | 79677          | 2                     | 1.08962                | 3.66E-05                | SMC6               |
| p.23527.2       | 23527          | 2                     | 1.07493                | 0.000213667             | ACAP2              |
| p.5203.1        | 5203           | 1                     | 1.07094                | 0.00070456              | PFDN4              |
| p.79888.2       | 79888          | 1                     | 1.05371                | 0.001510546             | LPCAT1             |
| p.26046.2       | 26046          | 1                     | 1.05281                | 0.000231483             | LTN1               |
| p.153339.1      | 153339         | 1                     | 1.04776                | 0.000311249             | TMEM167A           |
| p.55110.1       | 55110          | 2                     | 1.03488                | 0.001739127             | MAGOHB             |
| p.5469.1        | 5469           | 2                     | 1.02688                | 0.050409219             | MED1               |
| p.54800.1       | 54800          | 2                     | 1.0235                 | 0.002063174             | KLHL24             |
| p.11320.3       | 11320          | 4                     | 1.00629                | 0.028935489             | MGAT4A             |
| p.54149.1       | 54149          | 1                     | 0.997606               | 0.006795977             | C21orf91           |
| p.55971.1       | 55971          | 1                     | 0.989322               | 0.001160397             | BAIAP2L1           |
| p.22797.2       | 22797          | 1                     | 0.986222               | 0.007900227             | TFEC               |
| p.7994.2        | 7994           | 1                     | 0.966617               | 0.02085234              | MYST3              |
| p.10059.2       | 10059          | 1                     | 0.957199               | 0.000454561             | DNM1L              |
| p.25917.2       | 25917          | 1                     | 0.93798                | 0.000124526             | THUMPD3            |
| p.2786.2        | 2786           | 1                     | 0.932943               | 0.03126166              | GNG4               |

|            |        |   |          |             |          |
|------------|--------|---|----------|-------------|----------|
| p.133619.2 | 133619 | 2 | 0.932475 | 6.05E-05    | PRRC1    |
| p.56852.2  | 56852  | 2 | 0.928459 | 0.0137244   | RAD18    |
| p.6731.7   | 6731   | 1 | 0.917953 | 2.07E-05    | SRP72    |
| p.57720.3  | 57720  | 1 | 0.911116 | 5.37E-05    | GPR107   |
| p.8634.2   | 8634   | 1 | 0.891051 | 0.001914598 | RTCD1    |
| p.25836.1  | 25836  | 4 | 0.876987 | 0.005399843 | NIPBL    |
| p.135228.3 | 135228 | 2 | 0.875933 | 0.001249262 | CD109    |
| p.157680.4 | 157680 | 2 | 0.872486 | 0.005159905 | VPS13B   |
| p.9097.2   | 9097   | 1 | 0.871557 | 0.0013773   | USP14    |
| p.2885.2   | 2885   | 2 | 0.865555 | 0.000138914 | GRB2     |
| p.8030.1   | 8030   | 1 | 0.863186 | 0.011890665 | CCDC6    |
| p.125228.3 | 125228 | 1 | 0.858339 | 0.011574755 | C18orf19 |
| p.7175.1   | 7175   | 1 | 0.857776 | 0.000151936 | TPR      |
| p.57089.1  | 57089  | 1 | 0.848759 | 1.12E-06    | ENTPD7   |
| p.90806.2  | 90806  | 1 | 0.837183 | 0.001403134 | ANGEL2   |
| p.55207.1  | 55207  | 1 | 0.820868 | 0.022784284 | ARL8B    |
| p.10203.1  | 10203  | 2 | 0.807331 | 0.003429625 | CALCRL   |
| p.55153.2  | 55153  | 3 | 0.80623  | 0.002703631 | SDAD1    |
| p.7227.1   | 7227   | 3 | 0.80539  | 0.049064692 | TRPS1    |
| p.283209.1 | 283209 | 1 | 0.802976 | 0.013351419 | PGM2L1   |
| p.8065.2   | 8065   | 1 | 0.802513 | 0.000151257 | CUL5     |
| p.79828.1  | 79828  | 1 | 0.797501 | 0.000505914 | METTL8   |
| p.56943.1  | 56943  | 1 | 0.797174 | 0.000932962 | ENY2     |
| p.84901.2  | 84901  | 1 | 0.793092 | 2.86E-06    | NFATC2IP |
| p.255520.1 | 255520 | 1 | 0.792406 | 0.006672674 | ELMOD2   |
| p.5087.1   | 5087   | 1 | 0.790327 | 0.081207269 | PBX1     |
| p.84259.1  | 84259  | 1 | 0.788728 | 0.00425738  | DCUN1D5  |
| p.286148.5 | 286148 | 1 | 0.779111 | 0.003963532 | DPY19L4  |
| p.134430.1 | 134430 | 4 | 0.777661 | 0.000135153 | WDR36    |
| p.1737.3   | 1737   | 1 | 0.776573 | 0.004454858 | DLAT     |
| p.56474.1  | 56474  | 1 | 0.765375 | 0.003952036 | CTPS2    |
| p.6198.1   | 6198   | 1 | 0.765057 | 0.020871033 | RPS6KB1  |
| p.116150.1 | 116150 | 1 | 0.750093 | 0.0322726   | NUS1     |
| p.5048.2   | 5048   | 3 | 0.746829 | 0.002203512 | PAFAH1B1 |
| p.9969.5   | 9969   | 1 | 0.742792 | 0.011596419 | MED13    |
| p.56888.2  | 56888  | 2 | 0.741086 | 0.000265759 | KCMF1    |
| p.9126.2   | 9126   | 1 | 0.738587 | 0.002221341 | SMC3     |
| p.51122.3  | 51122  | 1 | 0.732167 | 0.026314018 | COMMD2   |
| p.6272.2   | 6272   | 2 | 0.722032 | 0.019363657 | SORT1    |
| p.9166.1   | 9166   | 1 | 0.71989  | 0.022713572 | EBAG9    |
| p.9868.1   | 9868   | 1 | 0.715714 | 0.003029771 | TOMM70A  |
| p.93663.2  | 93663  | 1 | 0.714849 | 0.018461196 | ARHGAP18 |
| p.808.1    | 808    | 1 | 0.70889  | 0.00084125  | CALM3    |
| p.2932.1   | 2932   | 4 | 0.706221 | 0.00148557  | GSK3B    |
| p.5873.1   | 5873   | 1 | 0.687671 | 0.009466502 | RAB27A   |
| p.55775.2  | 55775  | 1 | 0.684457 | 0.000295737 | TDP1     |
| p.55342.1  | 55342  | 1 | 0.6826   | 0.000318993 | STRBP    |

|            |        |   |          |             |          |
|------------|--------|---|----------|-------------|----------|
| p.3093.1   | 3093   | 2 | 0.661935 | 0.000702017 | UBE2K    |
| p.6924.1   | 6924   | 1 | 0.661442 | 0.000129949 | TCEB3    |
| p.6249.4   | 6249   | 2 | 0.659843 | 0.01775643  | CLIP1    |
| p.94104.2  | 94104  | 1 | 0.658328 | 0.000385359 | GCFC1    |
| p.64225.1  | 64225  | 2 | 0.65562  | 0.04834206  | ATL2     |
| p.55109.3  | 55109  | 2 | 0.644681 | 0.00450987  | AGGF1    |
| p.1362.1   | 1362   | 1 | 0.644267 | 0.164735867 | CPD      |
| p.127018.1 | 127018 | 1 | 0.640176 | 0.013850442 | LYPLAL1  |
| p.54726.2  | 54726  | 2 | 0.634034 | 0.000739965 | OTUD4    |
| p.7803.3   | 7803   | 4 | 0.632354 | 0.024478859 | PTP4A1   |
| p.4287.2   | 4287   | 4 | 0.625629 | 0.008551638 | ATXN3    |
| p.4026.4   | 4026   | 1 | 0.623232 | 0.037022049 | LPP      |
| p.9140.4   | 9140   | 1 | 0.622513 | 0.007886147 | ATG12    |
| p.25978.1  | 25978  | 1 | 0.61774  | 0.039418085 | CHMP2B   |
| p.58528.1  | 58528  | 1 | 0.614936 | 0.096105373 | RRAGD    |
| p.22936.1  | 22936  | 2 | 0.610072 | 0.049572333 | ELL2     |
| p.79939.1  | 79939  | 2 | 0.609574 | 0.006803917 | SLC35E1  |
| p.8545.1   | 8545   | 1 | 0.601315 | 0.016649492 | CGGBP1   |
| p.23161.1  | 23161  | 1 | 0.596947 | 0.000534007 | SNX13    |
| p.11052.2  | 11052  | 2 | 0.57751  | 0.001072231 | CPSF6    |
| p.163590.2 | 163590 | 1 | 0.575751 | 0.000151844 | TOR1AIP2 |
| p.11163.1  | 11163  | 2 | 0.574426 | 0.06813305  | NUDT4    |
| p.4205.2   | 4205   | 2 | 0.571992 | 0.058540682 | MEF2A    |
| p.9958.6   | 9958   | 1 | 0.571921 | 0.018085617 | USP15    |
| p.9373.2   | 9373   | 1 | 0.557663 | 0.039796087 | PLAA     |
| p.1432.1   | 1432   | 2 | 0.546392 | 0.060952202 | MAPK14   |
| p.143384.2 | 143384 | 1 | 0.541097 | 0.018544243 | C10orf46 |
| p.8774.1   | 8774   | 1 | 0.537813 | 0.009392055 | NAPG     |
| p.57456.1  | 57456  | 1 | 0.531792 | 0.005923904 | KIAA1143 |
| p.10892.1  | 10892  | 4 | 0.520433 | 0.084999374 | MALT1    |
| p.5586.1   | 5586   | 1 | 0.518789 | 0.039169085 | PKN2     |
| p.23704.1  | 23704  | 1 | 0.516073 | 0.201070101 | KCNE4    |
| p.518.1    | 518    | 1 | 0.514817 | 0.007245646 | ATP5G3   |
| p.57168.1  | 57168  | 1 | 0.514457 | 0.00304206  | ASPHD2   |
| p.9262.2   | 9262   | 1 | 0.514405 | 0.044452468 | STK17B   |
| p.26984.2  | 26984  | 1 | 0.493885 | 0.023470657 | SEC22A   |
| p.1629.1   | 1629   | 1 | 0.492596 | 0.016998642 | DBT      |
| p.55471.1  | 55471  | 1 | 0.490821 | 0.025843519 | C2orf56  |
| p.55320.1  | 55320  | 1 | 0.483879 | 0.003715179 | MIS18BP1 |
| p.5527.5   | 5527   | 1 | 0.477724 | 0.035496227 | PPP2R5C  |
| p.163.2    | 163    | 1 | 0.472397 | 0.118516768 | AP2B1    |
| p.54994.2  | 54994  | 1 | 0.470611 | 0.015759    | C20orf11 |
| p.51762.2  | 51762  | 1 | 0.454929 | 0.019597276 | RAB8B    |
| p.9306.3   | 9306   | 1 | 0.451307 | 0.08547743  | SOCS6    |
| p.377.1    | 377    | 1 | 0.449607 | 0.02246586  | ARF3     |
| p.1540.1   | 1540   | 4 | 0.444419 | 0.104850773 | CYLD     |
| p.11169.2  | 11169  | 1 | 0.44378  | 4.21E-05    | WDHD1    |

|            |        |   |          |             |          |
|------------|--------|---|----------|-------------|----------|
| p.23142.1  | 23142  | 1 | 0.430607 | 0.044486472 | DCUN1D4  |
| p.10100.3  | 10100  | 3 | 0.426983 | 0.106741319 | TSPAN2   |
| p.9180.4   | 9180   | 1 | 0.42312  | 0.300312912 | OSMR     |
| p.286205.2 | 286205 | 2 | 0.409166 | 0.000401905 | SCAI     |
| p.11127.2  | 11127  | 1 | 0.398149 | 0.044541766 | KIF3A    |
| p.4780.2   | 4780   | 1 | 0.390668 | 0.035514343 | NFE2L2   |
| p.285282.2 | 285282 | 1 | 0.390133 | 0.068636111 | RABL3    |
| p.1027.2   | 1027   | 1 | 0.38651  | 0.345813534 | CDKN1B   |
| p.23057.2  | 23057  | 1 | 0.377734 | 0.128271244 | NMNAT2   |
| p.7182.1   | 7182   | 4 | 0.377357 | 0.001919509 | NR2C2    |
| p.55973.2  | 55973  | 1 | 0.37611  | 0.003439249 | BCAP29   |
| p.23621.1  | 23621  | 1 | 0.375918 | 0.088379782 | BACE1    |
| p.488.3    | 488    | 2 | 0.364977 | 0.036378751 | ATP2A2   |
| p.285672.1 | 285672 | 1 | 0.36385  | 0.035363477 | SREK1IP1 |
| p.961.1    | 961    | 2 | 0.361648 | 0.360347354 | CD47     |
| p.81550.2  | 81550  | 1 | 0.360271 | 0.01056503  | TDRD3    |
| p.4097.1   | 4097   | 1 | 0.351628 | 0.062194883 | MAFG     |
| p.148808.1 | 148808 | 2 | 0.338065 | 0.279902064 | MFSD4    |
| p.91775.2  | 91775  | 1 | 0.337272 | 0.024718201 | FAM55C   |
| p.5786.1   | 5786   | 1 | 0.334142 | 0.046893298 | PTPRA    |
| p.55031.1  | 55031  | 1 | 0.334125 | 0.057210628 | USP47    |
| p.23362.4  | 23362  | 2 | 0.333083 | 0.503671369 | PSD3     |
| p.57539.1  | 57539  | 1 | 0.332467 | 0.076105229 | WDR35    |
| p.57148.2  | 57148  | 2 | 0.332243 | 0.009685689 | RALGAPB  |
| p.89796.2  | 89796  | 1 | 0.331881 | 0.284561598 | NAV1     |
| p.361.1    | 361    | 1 | 0.320445 | 0.326873028 | AQP4     |
| p.55796.2  | 55796  | 5 | 0.317619 | 0.006151172 | MBNL3    |
| p.4763.4   | 4763   | 3 | 0.313912 | 0.084647177 | NF1      |
| p.4238.1   | 4238   | 1 | 0.311914 | 0.12584843  | MFAP3    |
| p.55186.2  | 55186  | 1 | 0.305336 | 0.177787916 | SLC25A36 |
| p.9962.1   | 9962   | 1 | 0.303373 | 0.084565323 | SLC23A2  |
| p.92126.2  | 92126  | 1 | 0.301246 | 0.056845437 | DSEL     |
| p.64093.1  | 64093  | 1 | 0.295977 | 0.121331237 | SMOC1    |
| p.93.1     | 93     | 4 | 0.290566 | 0.170491525 | ACVR2B   |
| p.2137.1   | 2137   | 1 | 0.287783 | 0.073052301 | EXTL3    |
| p.10413.1  | 10413  | 1 | 0.286149 | 0.449788783 | YAP1     |
| p.5737.1   | 5737   | 2 | 0.28555  | 0.351363717 | PTGFR    |
| p.4848.2   | 4848   | 1 | 0.28483  | 0.196843522 | CNOT2    |
| p.10725.1  | 10725  | 2 | 0.277295 | 0.28728263  | NFAT5    |
| p.137492.2 | 137492 | 1 | 0.276748 | 0.265356893 | VPS37A   |
| p.128637.1 | 128637 | 2 | 0.271548 | 0.054531759 | TBC1D20  |
| p.79685.1  | 79685  | 1 | 0.27136  | 0.087746336 | SAP30L   |
| p.8763.1   | 8763   | 1 | 0.270601 | 0.544178404 | CD164    |
| p.29974.1  | 29974  | 3 | 0.268273 | 0.031311624 | A1CF     |
| p.51552.1  | 51552  | 2 | 0.268008 | 0.13921524  | RAB14    |
| p.3572.1   | 3572   | 1 | 0.264442 | 0.420538133 | IL6ST    |
| p.9139.2   | 9139   | 1 | 0.259734 | 0.064771407 | CBFA2T2  |

|            |        |   |          |             |          |
|------------|--------|---|----------|-------------|----------|
| p.208.1    | 208    | 1 | 0.257889 | 0.139680389 | AKT2     |
| p.23064.1  | 23064  | 1 | 0.254912 | 0.049366953 | SETX     |
| p.161742.1 | 161742 | 5 | 0.250255 | 0.281846114 | SPRED1   |
| p.64398.3  | 64398  | 1 | 0.249777 | 0.386893254 | MPP5     |
| p.5578.2   | 5578   | 3 | 0.243364 | 0.04786041  | PRKCA    |
| p.6400.3   | 6400   | 1 | 0.242434 | 0.240415741 | SEL1L    |
| p.91404.1  | 91404  | 3 | 0.23832  | 0.348952623 | SESTD1   |
| p.83548.3  | 83548  | 1 | 0.237782 | 0.129399801 | COG3     |
| p.54545.1  | 54545  | 2 | 0.235296 | 0.284736973 | MTMR12   |
| p.23493.1  | 23493  | 1 | 0.227029 | 0.61623904  | HEY2     |
| p.6641.2   | 6641   | 1 | 0.224681 | 0.295617098 | SNTB1    |
| p.80014.1  | 80014  | 1 | 0.22367  | 0.244246628 | WWC2     |
| p.1374.1   | 1374   | 1 | 0.217355 | 0.04804195  | CPT1A    |
| p.5728.2   | 5728   | 1 | 0.210932 | 0.357658116 | PTEN     |
| p.26092.2  | 26092  | 1 | 0.206119 | 0.446531071 | TOR1AIP1 |
| p.3709.1   | 3709   | 1 | 0.205776 | 0.432292013 | ITPR2    |
| p.387338.1 | 387338 | 1 | 0.205606 | 0.253652804 | NSUN4    |
| p.8492.2   | 8492   | 2 | 0.200164 | 0.101984163 | PRSS12   |
| p.84333.2  | 84333  | 1 | 0.195877 | 0.297644452 | PCGF5    |
| p.6452.2   | 6452   | 1 | 0.193542 | 0.17595779  | SH3BP2   |
| p.26268.1  | 26268  | 1 | 0.191478 | 0.231516911 | FBXO9    |
| p.81573.4  | 81573  | 2 | 0.188175 | 0.137506831 | ANKRD13C |
| p.9469.1   | 9469   | 1 | 0.184347 | 0.102089212 | CHST3    |
| p.84236.1  | 84236  | 1 | 0.178655 | 0.29395844  | RHBDD1   |
| p.115.1    | 115    | 1 | 0.178495 | 0.332623239 | ADCY9    |
| p.23001.1  | 23001  | 1 | 0.177003 | 0.43282014  | WDFY3    |
| p.7799.4   | 7799   | 1 | 0.174549 | 0.077378442 | PRDM2    |
| p.152137.1 | 152137 | 2 | 0.173612 | 0.491083372 | CCDC50   |
| p.9218.1   | 9218   | 2 | 0.170494 | 0.556554949 | VAPA     |
| p.3423.5   | 3423   | 2 | 0.166722 | 0.312045127 | IDS      |
| p.6886.1   | 6886   | 2 | 0.164429 | 0.136548178 | TAL1     |
| p.10657.1  | 10657  | 1 | 0.152746 | 0.318756281 | KHDRBS1  |
| p.143684.1 | 143684 | 2 | 0.152616 | 0.396998309 | FAM76B   |
| p.56243.4  | 56243  | 2 | 0.152163 | 0.414429553 | KIAA1217 |
| p.1983.6   | 1983   | 1 | 0.151745 | 0.493572749 | EIF5     |
| p.7520.2   | 7520   | 1 | 0.149639 | 0.309652006 | XRCC5    |
| p.148932.1 | 148932 | 1 | 0.149625 | 0.266023362 | MOBK2C   |
| p.56990.1  | 56990  | 1 | 0.141538 | 0.589484246 | CDC42SE2 |
| p.84056.1  | 84056  | 2 | 0.138149 | 0.176426541 | KATNAL1  |
| p.23390.1  | 23390  | 1 | 0.136651 | 0.315837341 | ZDHHC17  |
| p.2800.1   | 2800   | 1 | 0.129072 | 0.380388077 | GOLGA1   |
| p.56889.1  | 56889  | 1 | 0.128404 | 0.684977517 | TM9SF3   |
| p.27230.2  | 27230  | 1 | 0.125736 | 0.45835779  | SERP1    |
| p.83876.1  | 83876  | 1 | 0.125323 | 0.132301439 | MRO      |
| p.51343.1  | 51343  | 1 | 0.119375 | 0.50695366  | FZR1     |
| p.57496.3  | 57496  | 5 | 0.119347 | 0.120758719 | MKL2     |
| p.79817.2  | 79817  | 1 | 0.114455 | 0.494455151 | MOBK2B   |

|            |        |   |             |             |          |
|------------|--------|---|-------------|-------------|----------|
| p.801.3    | 801    | 2 | 0.109818    | 0.553505488 | CALM1    |
| p.51100.1  | 51100  | 2 | 0.108578    | 0.698189614 | SH3GLB1  |
| p.133746.1 | 133746 | 2 | 0.106794    | 0.474647079 | JMY      |
| p.4204.1   | 4204   | 1 | 0.105201    | 0.454633022 | MECP2    |
| p.154810.1 | 154810 | 2 | 0.100534    | 0.325051574 | AMOTL1   |
| p.11276.2  | 11276  | 1 | 0.0988962   | 0.581457768 | SYNRG    |
| p.26065.3  | 26065  | 3 | 0.0979143   | 0.585140705 | LSM14A   |
| p.79776.1  | 79776  | 1 | 0.0975801   | 0.167849972 | ZFHX4    |
| p.4093.1   | 4093   | 2 | 0.0962148   | 0.330471158 | SMAD9    |
| p.102.2    | 102    | 3 | 0.0960521   | 0.763043747 | ADAM10   |
| p.55719.3  | 55719  | 1 | 0.0946039   | 0.547054847 | FAM178A  |
| p.2674.2   | 2674   | 1 | 0.085502    | 0.883468476 | GFRA1    |
| p.143098.2 | 143098 | 2 | 0.0838597   | 0.567212111 | MPP7     |
| p.7057.2   | 7057   | 4 | 0.08262     | 0.788089149 | THBS1    |
| p.2889.1   | 2889   | 1 | 0.0762866   | 0.672692496 | RAPGEF1  |
| p.9236.2   | 9236   | 1 | 0.0577848   | 0.80076936  | CCPG1    |
| p.1106.3   | 1106   | 1 | 0.0564997   | 0.672185612 | CHD2     |
| p.2729.4   | 2729   | 1 | 0.0407808   | 0.88883392  | GCLC     |
| p.83999.1  | 83999  | 1 | 0.0403445   | 0.73255589  | KREMEN1  |
| p.4660.2   | 4660   | 1 | 0.0372442   | 0.544487442 | PPP1R12B |
| p.7204.3   | 7204   | 1 | 0.0286435   | 0.878192293 | TRIO     |
| p.4208.1   | 4208   | 2 | 0.0280783   | 0.851422555 | MEF2C    |
| p.10026.5  | 10026  | 2 | 0.0178547   | 0.94038073  | PIGK     |
| p.10424.4  | 10424  | 2 | 0.0134776   | 0.93881968  | PGRMC2   |
| p.3340.3   | 3340   | 1 | 0.0121369   | 0.9089681   | NDST1    |
| p.50808.2  | 50808  | 1 | 0.0118442   | 0.950998769 | AK3      |
| p.51621.1  | 51621  | 2 | 0.0094747   | 0.956808803 | KLF13    |
| p.54855.2  | 54855  | 1 | 0.00896938  | 0.977763612 | FAM46C   |
| p.81488.1  | 81488  | 1 | 0.00768531  | 0.963160408 | GRINL1A  |
| p.56605.4  | 56605  | 1 | 0.00643096  | 0.974446673 | ERO1LB   |
| p.10735.1  | 10735  | 1 | 0.00393394  | 0.98576474  | STAG2    |
| p.4851.1   | 4851   | 1 | -0.00162789 | 0.989875918 | NOTCH1   |
| p.5494.1   | 5494   | 4 | -0.0122894  | 0.946107026 | PPM1A    |
| p.8897.2   | 8897   | 1 | -0.0139983  | 0.906803551 | MTMR3    |
| p.160518.2 | 160518 | 2 | -0.0152684  | 0.7962659   | DENND5B  |
| p.894.1    | 894    | 1 | -0.0197799  | 0.913461919 | CCND2    |
| p.7020.2   | 7020   | 2 | -0.0274538  | 0.956229834 | TFAP2A   |
| p.79819.6  | 79819  | 1 | -0.0322384  | 0.737824555 | WDR78    |
| p.9839.2   | 9839   | 2 | -0.0383425  | 0.827712284 | ZEB2     |
| p.5337.3   | 5337   | 1 | -0.0410481  | 0.766926242 | PLD1     |
| p.8313.1   | 8313   | 1 | -0.0445589  | 0.619988739 | AXIN2    |
| p.22822.2  | 22822  | 6 | -0.0457664  | 0.90306617  | PHLDA1   |
| p.8649.2   | 8649   | 2 | -0.0532616  | 0.796255436 | LAMTOR3  |
| p.83464.1  | 83464  | 1 | -0.0568737  | 0.719683748 | APH1B    |
| p.84668.1  | 84668  | 1 | -0.0607184  | 0.639382996 | FAM126A  |
| p.23140.3  | 23140  | 1 | -0.0662972  | 0.469960771 | ZZEF1    |
| p.140885.2 | 140885 | 1 | -0.0689954  | 0.743861141 | SIRPA    |

|            |        |   |            |             |          |
|------------|--------|---|------------|-------------|----------|
| p.153396.1 | 153396 | 1 | -0.0710312 | 0.67834599  | TMEM161B |
| p.7058.5   | 7058   | 1 | -0.0856479 | 0.815942131 | THBS2    |
| p.1902.1   | 1902   | 1 | -0.104382  | 0.52560646  | LPAR1    |
| p.130574.2 | 130574 | 4 | -0.107264  | 0.365770639 | LYPD6    |
| p.79745.3  | 79745  | 2 | -0.107655  | 0.616144501 | CLIP4    |
| p.89795.1  | 89795  | 1 | -0.131101  | 0.119900809 | NAV3     |
| p.54756.1  | 54756  | 2 | -0.131135  | 0.271271129 | IL17RD   |
| p.54665.3  | 54665  | 1 | -0.135868  | 0.392906769 | RSBN1    |
| p.10015.2  | 10015  | 1 | -0.144086  | 0.493182855 | PDCD6IP  |
| p.51201.1  | 51201  | 1 | -0.145307  | 0.430826575 | ZDHHC2   |
| p.66008.4  | 66008  | 1 | -0.150806  | 0.524273993 | TRAK2    |
| p.55715.3  | 55715  | 1 | -0.163888  | 0.13452526  | DOK4     |
| p.23405.2  | 23405  | 2 | -0.172374  | 0.486693047 | DICER1   |
| p.23387.3  | 23387  | 2 | -0.174896  | 0.392031886 | SIK3     |
| p.538.1    | 538    | 1 | -0.178314  | 0.402682107 | ATP7A    |
| p.11099.1  | 11099  | 1 | -0.185514  | 0.013349693 | PTPN21   |
| p.11334.2  | 11334  | 1 | -0.201129  | 0.228502379 | TUSC2    |
| p.1602.1   | 1602   | 2 | -0.202125  | 0.460408697 | DACH1    |
| p.29123.7  | 29123  | 1 | -0.202347  | 0.410008021 | ANKRD11  |
| p.7556.1   | 7556   | 1 | -0.20608   | 0.204396309 | ZNF10    |
| p.2060.3   | 2060   | 2 | -0.211391  | 0.244547165 | EPS15    |
| p.29068.1  | 29068  | 2 | -0.227284  | 0.296079005 | ZBTB44   |
| p.3915.3   | 3915   | 1 | -0.265352  | 0.353620201 | LAMC1    |
| p.10217.3  | 10217  | 2 | -0.274235  | 0.130316239 | CTDSPL   |
| p.6500.6   | 6500   | 1 | -0.280407  | 0.151985502 | SKP1     |
| p.153222.3 | 153222 | 3 | -0.298181  | 0.093405869 | C5orf41  |
| p.6777.1   | 6777   | 1 | -0.316894  | 0.030150255 | STAT5B   |
| p.83700.2  | 83700  | 2 | -0.318731  | 8.57E-05    | JAM3     |
| p.5412.4   | 5412   | 1 | -0.326029  | 0.13943951  | UBL3     |
| p.23768.1  | 23768  | 1 | -0.359359  | 0.000294524 | FLRT2    |
| p.5937.1   | 5937   | 1 | -0.366876  | 0.110424796 | RBMS1    |
| p.2119.2   | 2119   | 1 | -0.37498   | 0.111021787 | ETV5     |
| p.6867.1   | 6867   | 1 | -0.380351  | 0.306685828 | TACC1    |
| p.26053.2  | 26053  | 2 | -0.382417  | 0.031395058 | AUTS2    |
| p.57616.1  | 57616  | 1 | -0.406895  | 0.024206049 | TSHZ3    |
| p.79875.3  | 79875  | 1 | -0.412747  | 0.106648899 | THSD4    |
| p.6926.1   | 6926   | 3 | -0.429427  | 0.17521498  | TBX3     |
| p.92.1     | 92     | 1 | -0.475598  | 0.011835869 | ACVR2A   |
| p.10929.1  | 10929  | 1 | -0.509401  | 0.013936609 | SRSF8    |
| p.1500.2   | 1500   | 1 | -0.521875  | 0.040376858 | CTNND1   |
| p.7905.2   | 7905   | 2 | -0.546689  | 0.074385262 | REEP5    |
| p.6558.1   | 6558   | 2 | -0.563669  | 0.186800463 | SLC12A2  |
| p.89797.1  | 89797  | 1 | -0.565451  | 0.003070541 | NAV2     |
| p.55450.1  | 55450  | 1 | -0.709479  | 0.210456846 | CAMK2N1  |
| p.4211.1   | 4211   | 1 | -0.777265  | 8.24E-06    | MEIS1    |
| p.80310.1  | 80310  | 1 | -0.80233   | 4.40E-06    | PDGFD    |
| p.116496.2 | 116496 | 1 | -0.884717  | 0.034323472 | FAM129A  |

|           |       |   |           |             |         |
|-----------|-------|---|-----------|-------------|---------|
| p.36.1    | 36    | 1 | -0.918384 | 0.047647336 | ACADSB  |
| p.23452.1 | 23452 | 1 | -0.976362 | 1.14E-07    | ANGPTL2 |
| p.10350.3 | 10350 | 1 | -1.20567  | 6.29E-16    | ABCA9   |
| p.3725.2  | 3725  | 2 | -1.21448  | 0.000139363 | JUN     |
| p.120.1   | 120   | 1 | -1.40224  | 0.000412452 | ADD3    |
| p.7021.1  | 7021  | 2 | -1.46108  | 0.022040325 | TFAP2B  |
| p.1846.3  | 1846  | 1 | -1.55448  | 0.005487796 | DUSP4   |
| p.3479.1  | 3479  | 1 | -1.6844   | 2.18E-09    | IGF1    |
| p.8614.2  | 8614  | 1 | -2.77791  | 8.24E-11    | STC2    |



## Lengthened 3'UTRs

| APA site   | gene ID | Gain PUM sites | log fold change | P-value diff. expr. | gene symbol |
|------------|---------|----------------|-----------------|---------------------|-------------|
| p.2308.2   | 2308    | 1              | -1.6295         | 1.64E-08            | FOXO1       |
| p.6309.2   | 6309    | 1              | -1.62248        | 2.12E-06            | SC5DL       |
| p.9252.2   | 9252    | 1              | -1.54632        | 0.00011932          | RPS6KA5     |
| p.3667.2   | 3667    | 8              | -1.4955         | 0.001657433         | IRS1        |
| p.57125.1  | 57125   | 1              | -1.30928        | 0.000306387         | PLXDC1      |
| p.56898.1  | 56898   | 1              | -1.2938         | 8.58E-05            | BDH2        |
| p.6925.1   | 6925    | 3              | -1.25683        | 0.000600007         | TCF4        |
| p.3176.2   | 3176    | 2              | -1.19904        | 0.00027889          | HNMT        |
| p.81563.5  | 81563   | 1              | -1.16602        | 0.001680965         | C1orf21     |
| p.55603.1  | 55603   | 1              | -1.12472        | 0.007161292         | FAM46A      |
| p.11170.1  | 11170   | 1              | -1.09491        | 0.006247135         | FAM107A     |
| p.81539.1  | 81539   | 3              | -0.828634       | 0.019664202         | SLC38A1     |
| p.10491.3  | 10491   | 1              | -0.790634       | 0.000170561         | CRTAP       |
| p.51312.2  | 51312   | 1              | -0.782017       | 0.058080082         | SLC25A37    |
| p.26469.2  | 26469   | 1              | -0.70474        | 0.011680346         | PTPN18      |
| p.131566.7 | 131566  | 1              | -0.690306       | 0.00437571          | DCBLD2      |
| p.9218.6   | 9218    | 2              | -0.671798       | 0.001230882         | VAPA        |
| p.79365.1  | 79365   | 1              | -0.668554       | 0.112433371         | BHLHE41     |
| p.573.2    | 573     | 1              | -0.631085       | 0.025300848         | BAG1        |
| p.6622.1   | 6622    | 1              | -0.600955       | 4.63E-06            | SNCA        |
| p.64778.2  | 64778   | 1              | -0.578246       | 0.038028609         | FNDC3B      |
| p.200958.1 | 200958  | 2              | -0.553899       | 0.135360905         | MUC20       |
| p.64388.1  | 64388   | 1              | -0.534599       | 0.002645254         | GREM2       |
| p.171425.3 | 171425  | 1              | -0.516825       | 0.015380678         | CLYBL       |
| p.23038.1  | 23038   | 2              | -0.509143       | 0.000334            | WDTC1       |
| p.175.1    | 175     | 2              | -0.429467       | 0.154322571         | AGA         |
| p.84897.2  | 84897   | 1              | -0.406707       | 0.018423573         | TBRG1       |
| p.8874.2   | 8874    | 1              | -0.399612       | 0.043162955         | ARHGEF7     |
| p.55333.3  | 55333   | 1              | -0.396708       | 0.114101202         | SYNJ2BP     |
| p.54491.1  | 54491   | 1              | -0.289698       | 0.053320848         | FAM105A     |
| p.23607.2  | 23607   | 2              | -0.225057       | 0.1281634           | CD2AP       |
| p.51249.1  | 51249   | 1              | -0.167554       | 0.508842086         | TMEM69      |
| p.80306.1  | 80306   | 1              | -0.145682       | 0.567196653         | MED28       |
| p.79752.2  | 79752   | 1              | -0.144008       | 0.677482834         | ZFAND1      |
| p.9562.1   | 9562    | 1              | 0.00641579      | 0.970841107         | MINPP1      |
| p.115350.1 | 115350  | 2              | 0.0147064       | 0.899185368         | FCRL1       |
| p.1977.1   | 1977    | 3              | 0.0440604       | 0.654658669         | EIF4E       |
| p.6672.5   | 6672    | 1              | 0.0604781       | 0.78030873          | SP100       |
| p.6651.1   | 6651    | 1              | 0.0629671       | 0.755235526         | SON         |
| p.65108.1  | 65108   | 1              | 0.0936532       | 0.697927499         | MARCKSL1    |
| p.149371.1 | 149371  | 1              | 0.180538        | 0.358534392         | EXOC8       |
| p.6738.1   | 6738    | 1              | 0.211184        | 0.241726643         | TROVE2      |
| p.4883.1   | 4883    | 1              | 0.226194        | 0.201443            | NPR3        |
| p.90268.2  | 90268   | 1              | 0.29415         | 0.063667699         | FAM105B     |

|            |        |   |          |             |       |
|------------|--------|---|----------|-------------|-------|
| p.3225.2   | 3225   | 1 | 0.306857 | 0.395120885 | HOXC9 |
| p.3842.3   | 3842   | 1 | 0.307704 | 0.107106004 | TNPO1 |
| p.23213.2  | 23213  | 1 | 1.05363  | 0.020403615 | SULF1 |
| p.259266.1 | 259266 | 1 | 1.25827  | 4.23E-05    | ASPM  |
| p.51514.1  | 51514  | 1 | 1.87144  | 1.63E-06    | DTL   |

Miles Supplementary Table 2: Primers and siRNAs

**Primers**

| <b>3'RACE RT-PCR Primer</b> | <b>Sequence</b>                                        |
|-----------------------------|--------------------------------------------------------|
| P7-t25-vn oligo-dT primer   | CAAGCAGAAGACGGCATAACGAGATTTTTTTTTTTTTTTTTTTTTTTTTTTTTT |
| CSTF2 forward               | ATCCTTGCCTGCGAATGTCC                                   |
| CSTF2 reverse               | GGGTGGTCCTCGGCTCTC                                     |
| CSTF3 forward               | TGAAGTGGATAGAAAACCAGAATACCC                            |
| CSTF3 reverse               | TGAAACAGATAGGAGGAGGGAGA                                |
| CPSF2 forward               | CTTTGGAACCCCTTGCCACCT                                  |
| CPSF2 reverse               | TGCGGACTGCTACTTGATTGTTG                                |
| TMEM119 proximal forward    | CCCTGGCAACATTGTGAGACC                                  |
| TMEM119 distal forward      | TCTCCCCATCCCTCCATCT                                    |
| FAM100B proximal forward    | CAGGAGTTTTTCAGGCAAGTTTTTC                              |
| FAM100B distal forward      | AGTGGAGAGCCTGCCTTTGG                                   |
| P7 forward                  | CAAGCAGAAGACGGCATAACGAGA                               |
| NRAS distal forward         | GGATGTCCGTGGAAGTTGTAA                                  |
| NRAS proximal forward       | TTTGTTCCTAGCTTACTGA                                    |
| JUN distal forward          | GGTGCTTATTCTCAAAGCAGGA                                 |
| JUN proximal forward        | GCTTCTGTACTCCTTAAGAACACA                               |
| actin forward distal        | CAGCCAGGGCTTACCTGT                                     |

| <b>Tumor RT-PCR Primers</b>  | <b>Sequence</b>          |
|------------------------------|--------------------------|
| FOXA1 TUMOR RT FOR           | CTCCTACTGGACGCTGCAC      |
| FOXA1 TUMOR RT REV           | GCAAGTAGCAGCCGTTCTC      |
| SMG1 TUMOR RT FOR            | GACGTGCTTAATGAAAGTAGCAA  |
| SMG1 TUMOR RT REV            | AAGGCCAAGACAGCAAGC       |
| CCND1 TUMOR RT FOR           | AGATCATCCGCAAACACG       |
| CCND1 TUMOR RT REV           | TGAACTTCACATCTGTGGCA     |
| STAT5B UTR 2 TUMOR FOR       | CATGTGGCTGTTTGAATAAGAGA  |
| STAT5B UTR 2 TUMOR REV       | GACGAAGACTCACTGGAGCA     |
| STAT5B CDS TUMOR FOR         | GCTAAAGCTGTTGATGGATACG   |
| STAT5B CDS TUMOR REV         | GATGCGTTCACAAACTCAGG     |
| PTEN UTR2 TUMOR FOR          | GTCATGCATGCAGATGGAA      |
| PTEN UTR2 TUMOR REV          | CTGCCAAATACTACAGTTAAAGCC |
| PTEN CDS TUMOR FOR           | ACACGACGGGAAGACAAGTT     |
| PTEN CDS TUMOR REV           | CTTTGATATCACCACACACAGG   |
| FOXO1 UTR1 TUMOR FOR         | AGACTTGGCAGCAAAGACATT    |
| FOXO1 UTR1 TUMOR REV         | GCAGCACATAACCTGCACA      |
| FOXO1 UTR2 TUMOR FOR         | TGAATCCTTGGTAGCTCTCTGA   |
| FOXO1 UTR1 TUMOR REV         | TTGCTTTCCAGACAGACCAG     |
| RHOF UTR2 TUMOR FOR          | CGTCAGCTAAACCTGAGCTTC    |
| RHOF UTR2 TUMOR REV          | GGGAGGGTCTCAGAAGGC       |
| RHOF UTR1 TUMOR FOR          | CTGCGGCTAGACTCTTGGA      |
| RHOF UTR1 TUMOR REV          | GGGAGTTTGTGGTCAGAGC      |
| IRS1 UTR1 TUMOR FOR          | GCACTCTGTAGGTTAGTCCATCA  |
| IRS1 UTR1 TUMOR REV          | CCGCCAAGGTCTTAATTCAC     |
| IRS1 UTR2 TUMOR FOR          | GCCATGGGTCCTTTCTGA       |
| IRS1 UTR2 TUMOR REV          | ACAGACTTACAGAACTACGGAAGG |
| c-JUN RT-PCR for tumor CDNA1 | aacgtgacagatgagcagga     |
| c-JUN RT-PCR rev tumor CDNA1 | gtttctggctgtgcagttc      |
| c-JUN RT-PCR for tumor CDNA2 | gaaggaggagcctcagacag     |
| c-JUN RT-PCR rev tumor CDNA2 | ctgggactccatgtcagtg      |
| c-JUN RT-PCR for tumor 3utr1 | aagttgcgacggagagaaaa     |
| c-JUN RT-PCR rev tumor 3utr1 | acgcaaccagtcctcaactt     |
| c-JUN RT-PCR for tumor 3utr2 | tcaataaacagcttcagccttt   |
| c-JUN RT-PCR rev tumor 3utr2 | acaactctggcaggatacc      |

|                                 |                       |
|---------------------------------|-----------------------|
| c-JUN RT-PCR for tumor 3utr2-1  | ggatagtgcgatgttcagga  |
| c-JUN RT-PCR rev tumor 3utr2-1  | gacttctcagtggtgtcc    |
| NRAS RT-PCR FOR TUMOR1 CDS 1    | tggtgaaacctgtttgttg   |
| NRAS RT-PCR REV TUMOR1 CDS 1    | tcgcctgtcctcatgtattg  |
| NRAS RT-PCR FOR TUMOR1 CDS 2    | acaaaacaagcccacgaact  |
| NRAS RT-PCR REV TUMOR1 CDS 2    | aacaccctgtctggcttgg   |
| NRAS RT-PCR FOR TUMOR1 3UTR1    | cacccagggttttcatctg   |
| NRAS RT-PCR REV TUMOR1 3'UTR1   | gaattcacgtttgcggtt    |
| NRAS RT-PCR FOR TUMOR1 3UTR1-1  | ttgagagcagatgccattt   |
| NRAS RT-PCR REV TUMOR1 3'UTR1-1 | ctgggaaagcccaaac      |
| NRAS RT-PCR FOR TUMOR1 3UTR2    | ctctacagctccccacag    |
| NRAS RT-PCR REV TUMOR1 3'UTR2   | ggtccattagcaccatgctt  |
| NRAS RT-PCR FOR TUMOR1 3UTR2-1  | agcctgggtgacaagagaga  |
| NRAS RT-PCR REV TUMOR1 3'UTR2-1 | cctttgtccaaattcaca    |
| E2F4 RT-PCR FOR TUMORS CDS1     | tcacagaggacgtgcagaac  |
| E2F4 RT-PCR REV TUMORS CDS1     | agggtatctccagcaagca   |
| E2F4 RT-PCR FOR TUMORS CDS1-1   | ggaccaacccttctacctc   |
| E2F4 RT-PCR REV TUMORS CDS1-1   | tgacagctctttggggagtt  |
| E2F4 RT-PCR FOR TUMORS 3UTR1    | accgaggagctgccattac   |
| E2F4 RT-PCR REV TUMORS 3UTR1    | ctggcagaagcaagacactg  |
| E2F4 RT-PCR FOR TUMORS 3UTR1-1  | cacttctgctgggcctttag  |
| E2F4 RT-PCR REV TUMORS 3UTR1-1  | ccccagagacctctgttct   |
| CSTF2 TUMOR Forward             | TAGTCTCTGGAGGAGGAATG  |
| CSTF2 TUMOR Reverse             | CGTTCCATGGACACTGGTC   |
| CPSF2 TUMOR Forward             | GCAGCTTCTGACAAATGTCCT |
| CPSF2 TUMOR Reverse             | CCTGCTGTGTCCACTGCTAT  |
| E2F1 TUMOR Forward              | TGCAGAGCAGATGGTTATGG  |
| E2F1 TUMOR Reverse              | GAAAGTTCTCCGAAGAGTCCA |
| E2F4 TUMOR Forward              | GAGATACCCTCTTGGCCATC  |
| E2F4 TUMOR Reverse              | CCCATTGAGACCCTCTGG    |
| CFIM25 TUMOR FOR                | ATACTGGGTCGTCAGGATGG  |
| CFIM25 TUMOR REV                | TCTCCACCAGTTACCAATGC  |
| KRT7 For tumor                  | AGGTGGATGCCCTGAATG    |
| KRT7 rev tumor                  | GCTCTGTCAACTCCGTCTCA  |
| KRT19 for tumor                 | TTGTCCTGCAGATCGACAAAT |
| KRT 19 rev tumor                | GTCTCAAACCTTGTTCCGAAG |
| TIMP1 for tumor                 | AGTGTCTGCGGATACTTCCA  |
| TIMP1 rev tumor                 | TTCCAGCAATGAGAACTCCT  |
| PUM1 tumor forward              | ACTTGCTCTGGAGGGAAGAG  |
| PUM1 tumor reverse              | TGGATTCATCTGTTTCCCAA  |
| PUM2 tumor forward              | TGGAAGTGTAACCTTTGGG   |
| PUM2 tumor reverse              | TGCCAACTGATGAACCAAAT  |

| RT-PCR Primers | Sequence              |
|----------------|-----------------------|
| cycd1 Forward  | CCGTCCATGCGGAAGATC    |
| cycd1 Reverse  | ATGGCCAGCGGAAGAC      |
| bim Forward    | TGGCAAAGCAACCTTCTGATG |
| bim Reverse    | GCAGGCTGCAATTGTCTACCT |
| trail Forward  | GCTCTGGGCCGCAAAAT     |
| trail Reverse  | TGCAAGTTGCTCAGGAATGAA |
| DR5 Forward    | GGGCCACAGGGACACCTT    |
| DR5 Reverse    | GCATCTCGCCCGGTTTT     |

| siRNA       | sense               |
|-------------|---------------------|
| PUM2-136881 | GCUUUCACCAUUCUAUUGU |
| PUM2-136882 | GCAUGGUAGAAUAUGUAUU |
| PUM2-136883 | CGAGUAAGUAGACAAGAAU |

|               |                      |
|---------------|----------------------|
| PUM1-138317   | GCAACUAAUUCAGCUGAAUC |
| PUM1-138318   | GCUAAUCAACAGACCACCC  |
| PUM1-138319   | CCAGACACUCCCUAUUUUA  |
| CSTF77-145771 | GCAUUCUCAUUCGAGAGGC  |
| CSTF77-145772 | GCUGUCCGAAGAGUUUAUC  |
| CSTF77-145773 | GCACUCAUGGAAUUAUACU  |

|                    |                     |
|--------------------|---------------------|
| PABPN1-J-011803-05 | GGAACGGCCUGGAGUCUGA |
| PABPN1-J-011803-06 | AGUCAACCGUGUUACCAUA |
| PABPN1-J-011803-07 | GAGUCCACCUCCAGGCAAU |
| PABPN1-J-011803-08 | UAUCAAGCUCGAGUCAGG  |

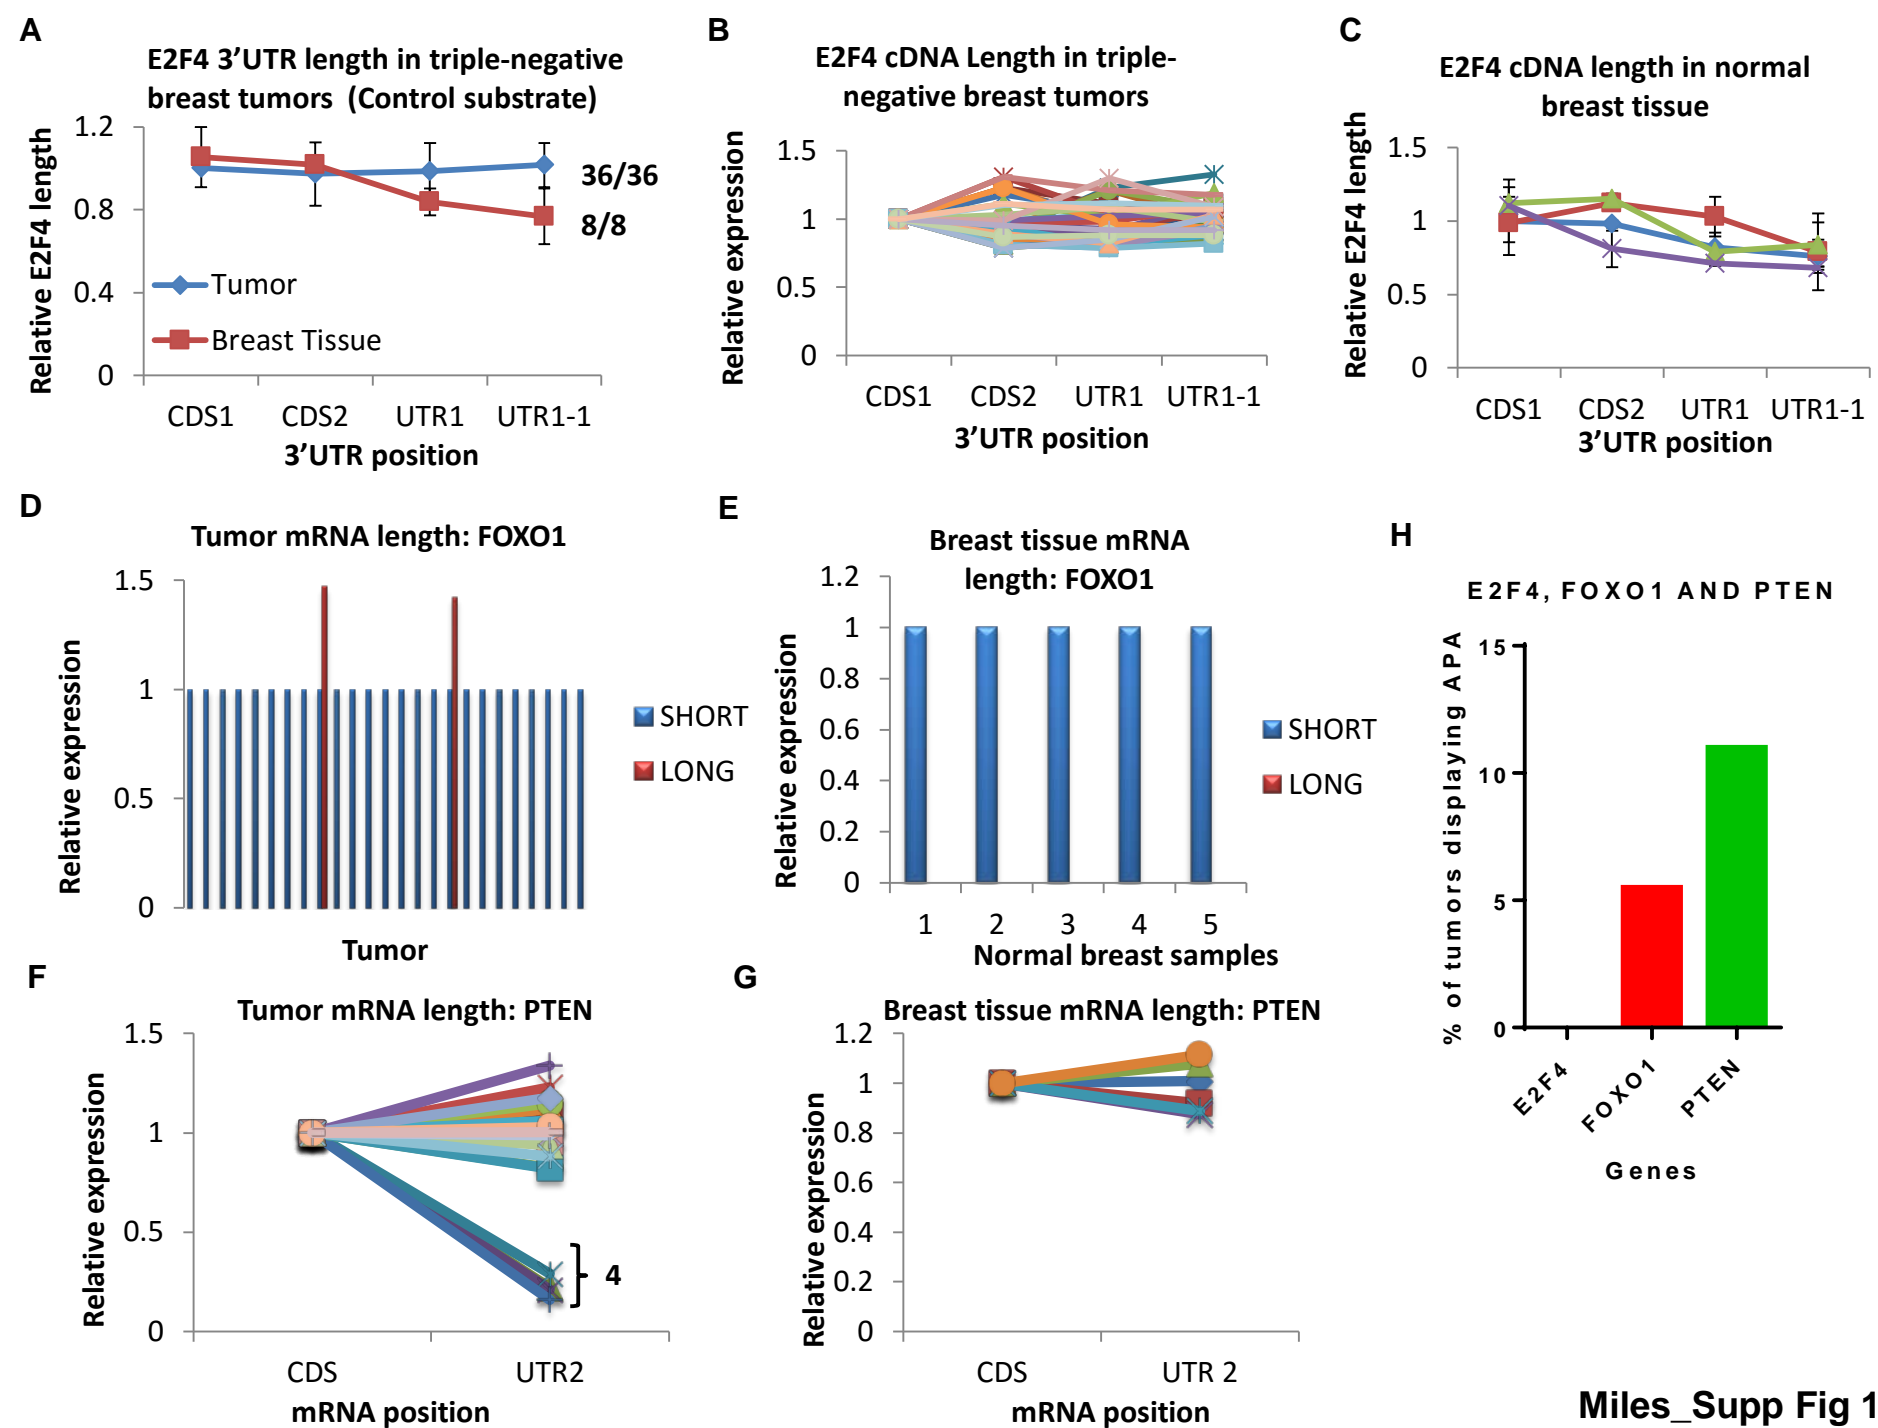

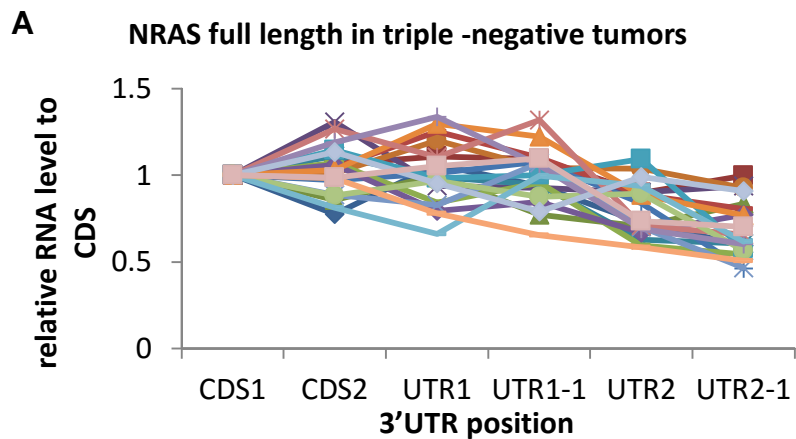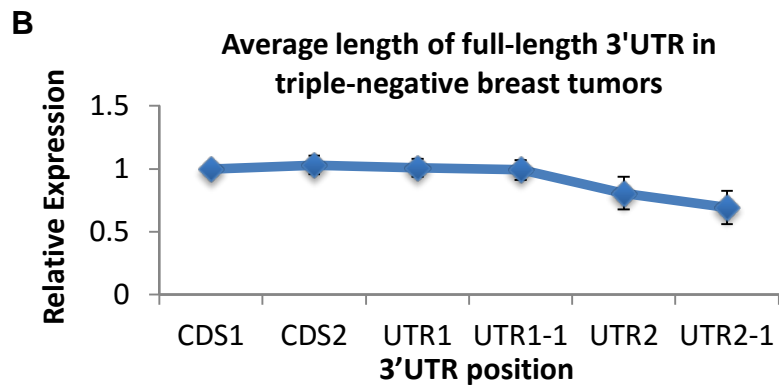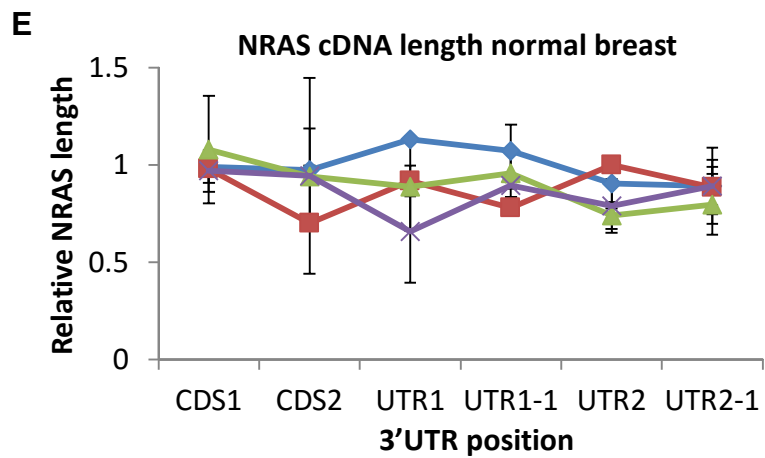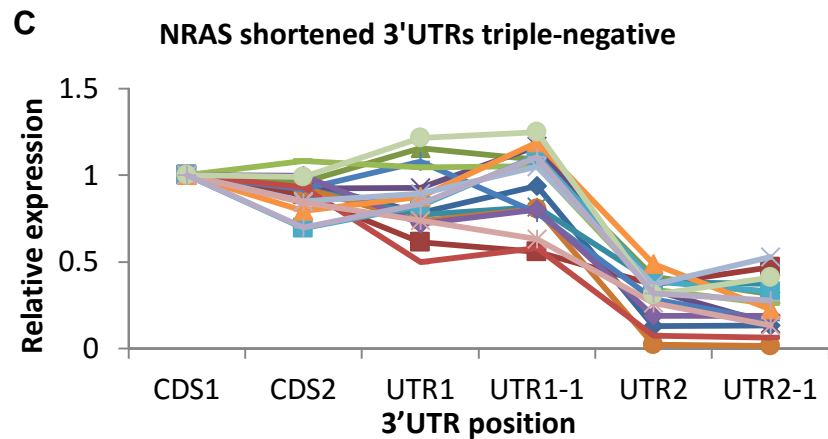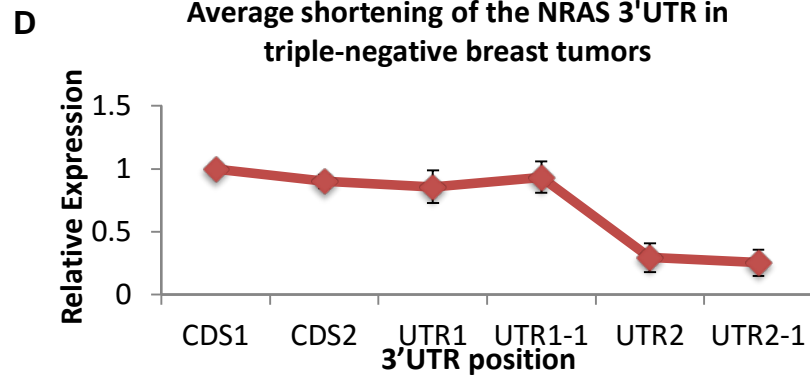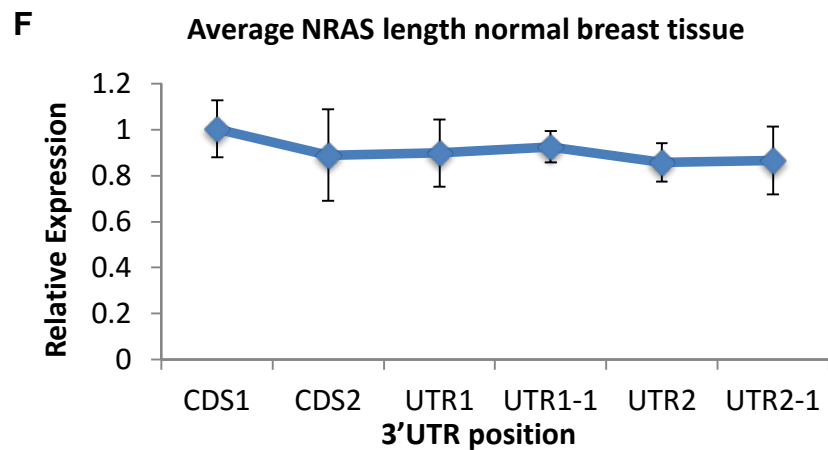

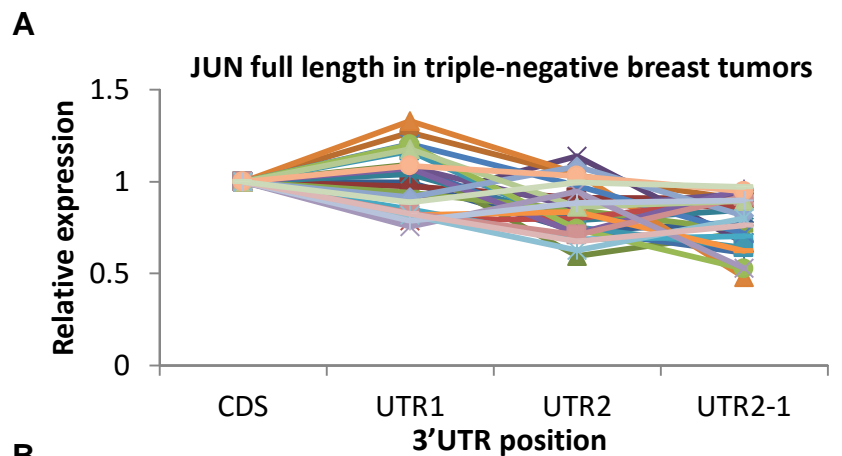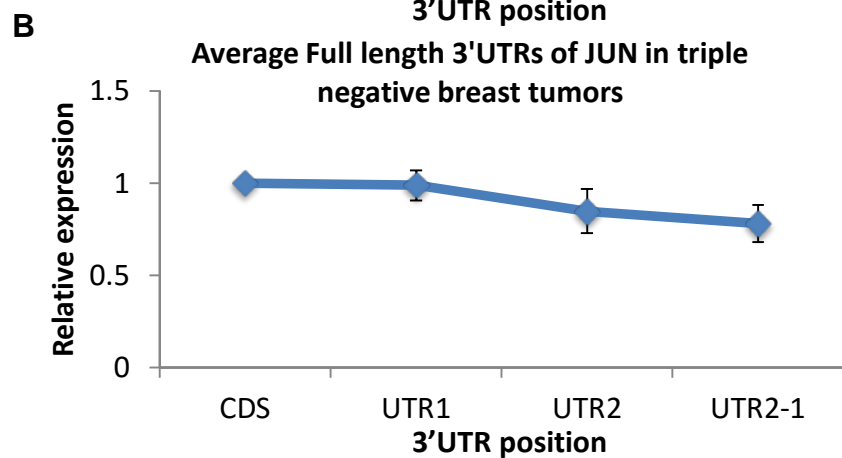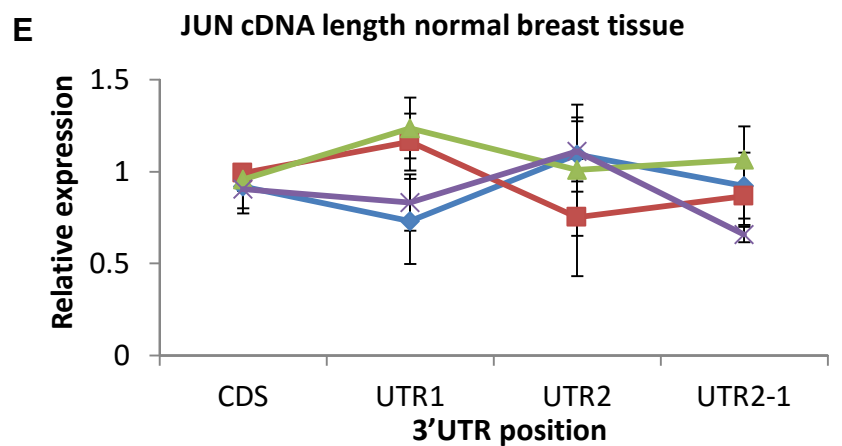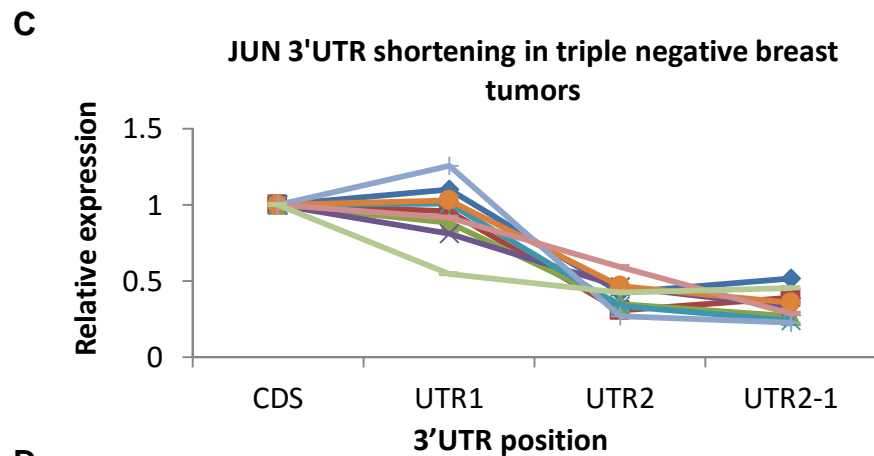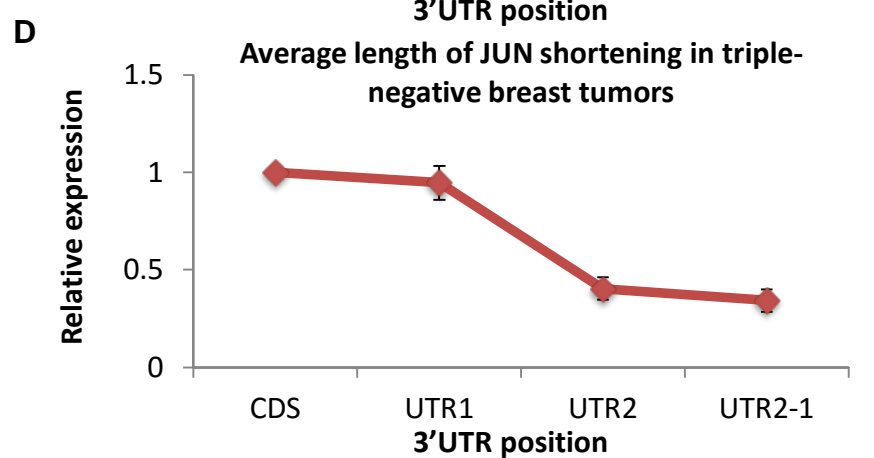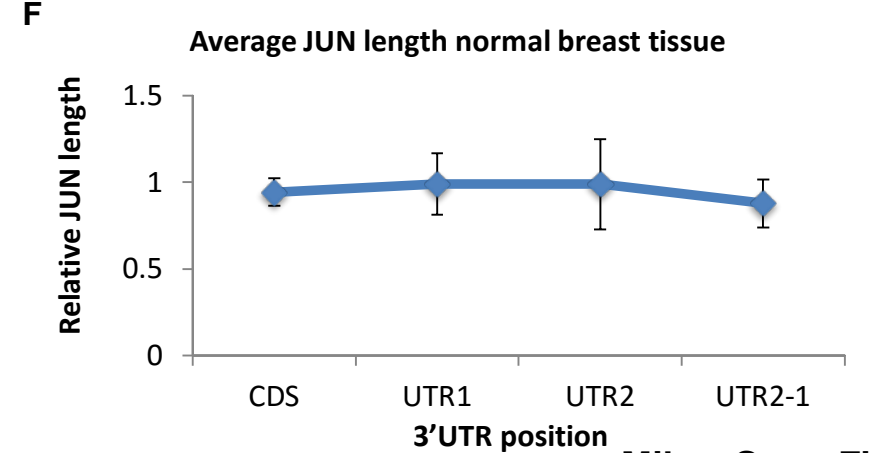



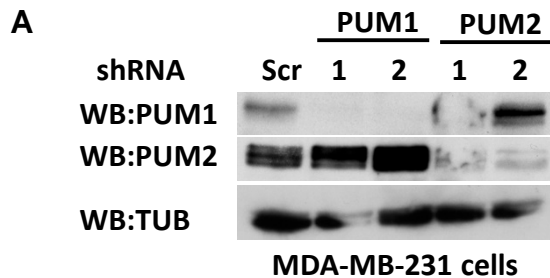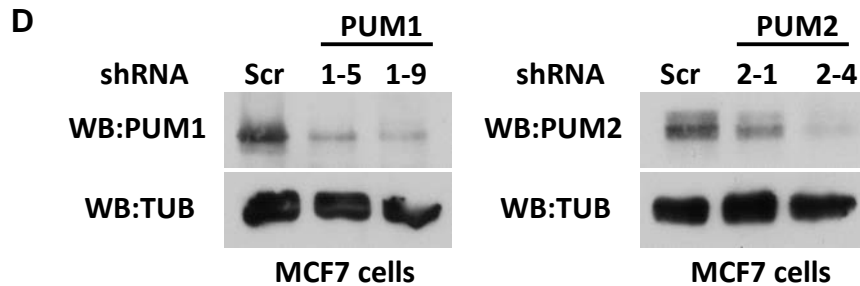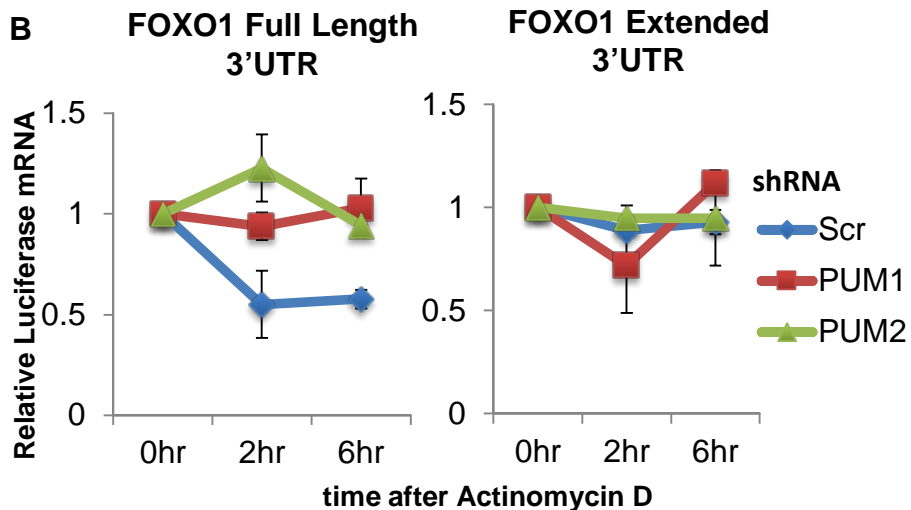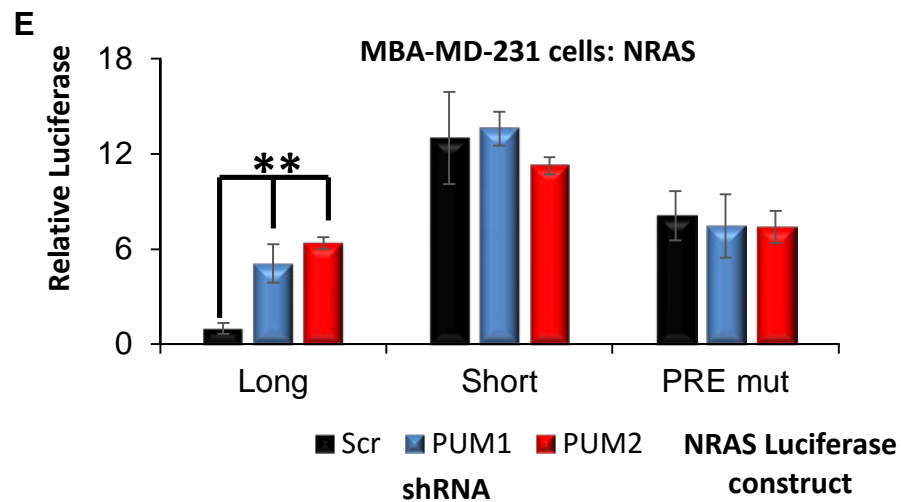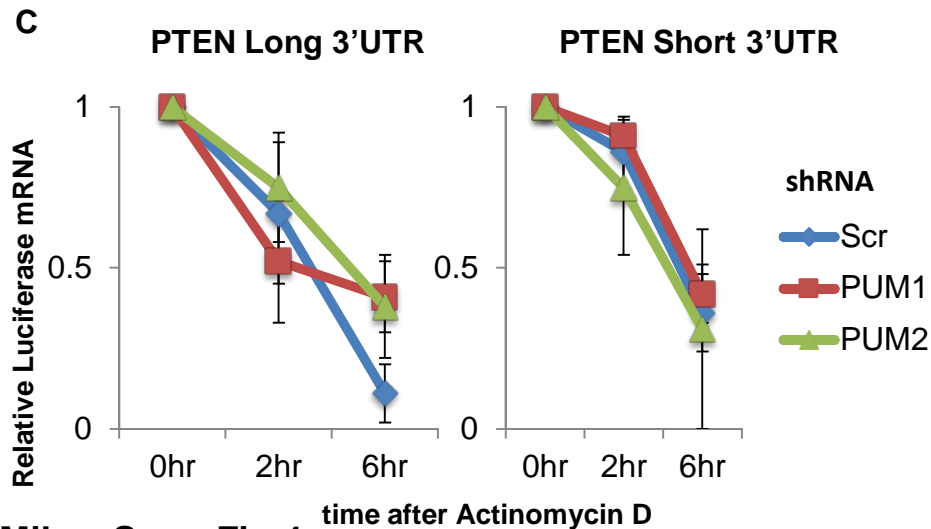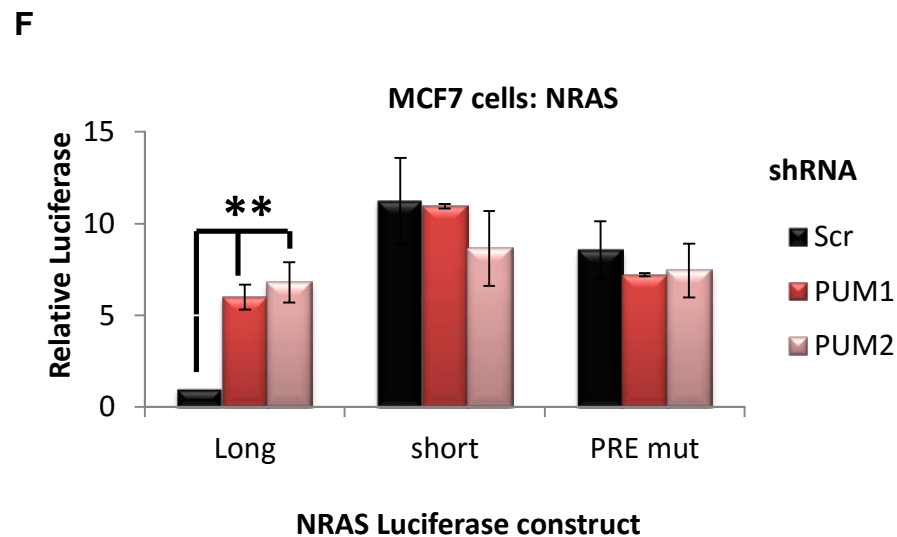

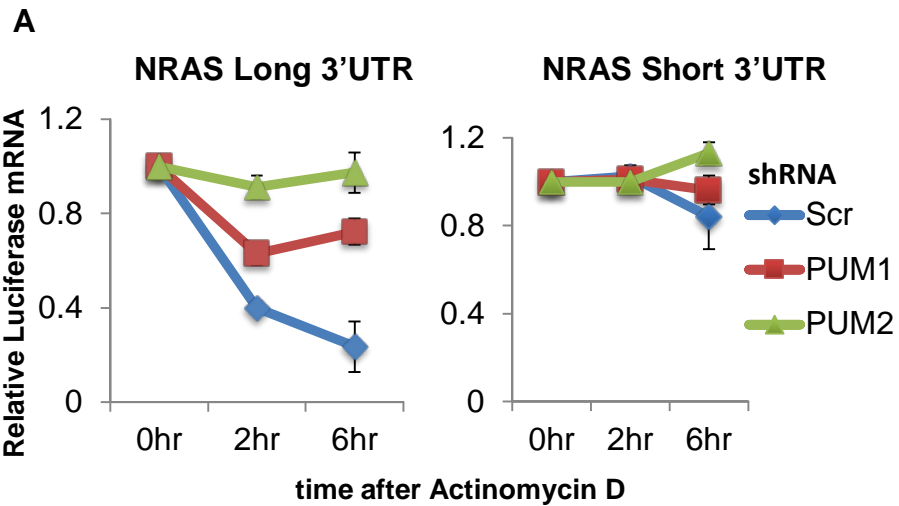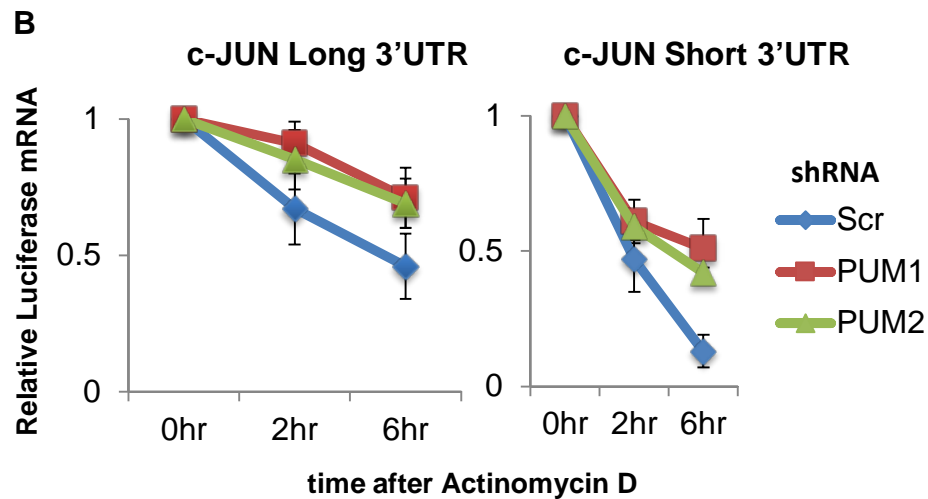

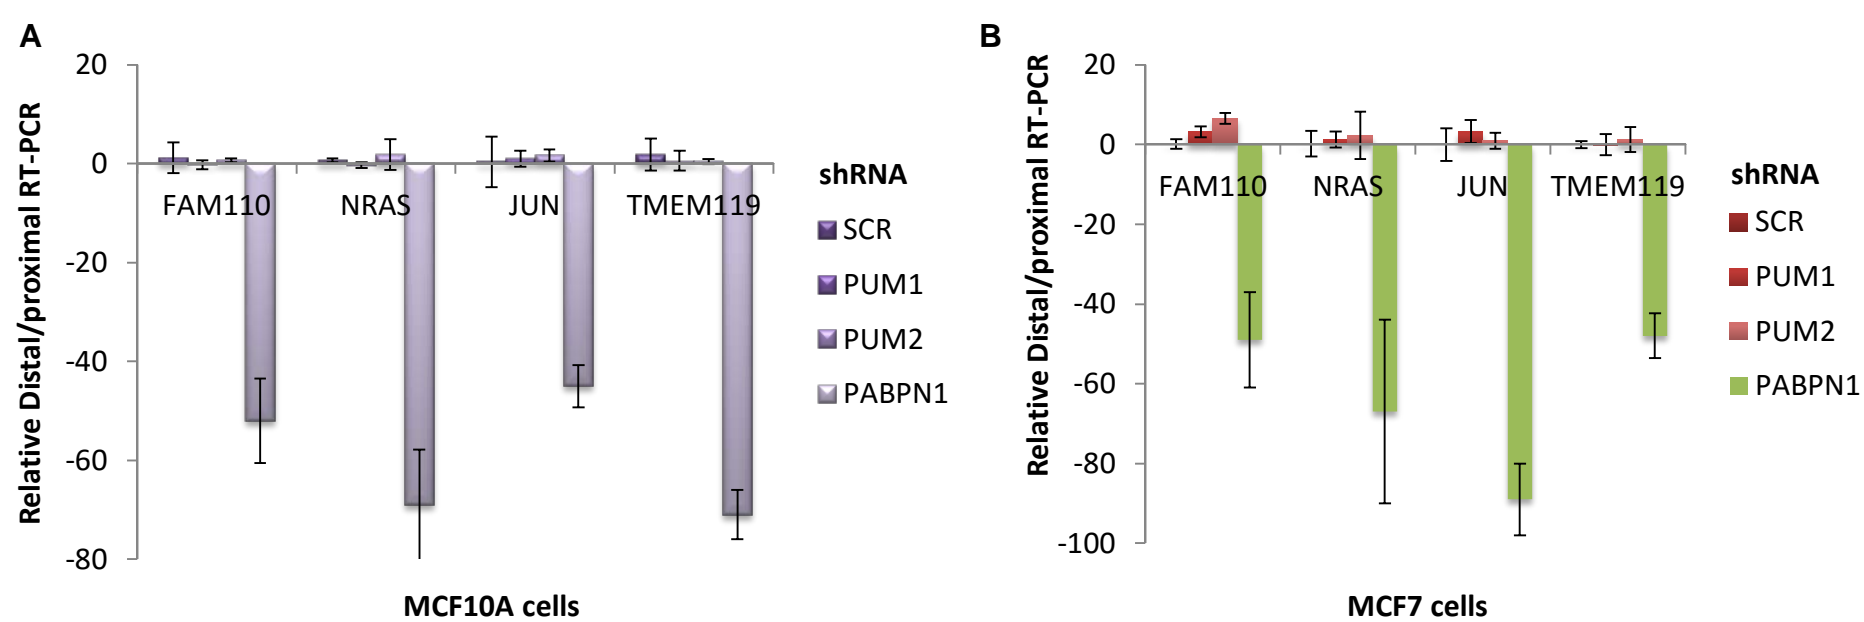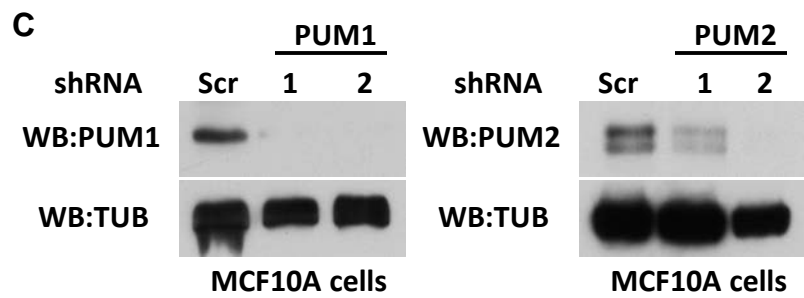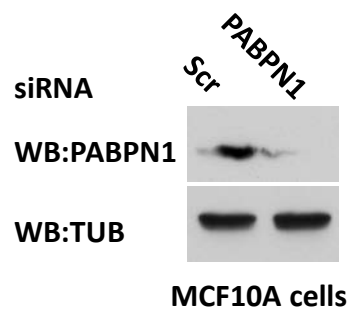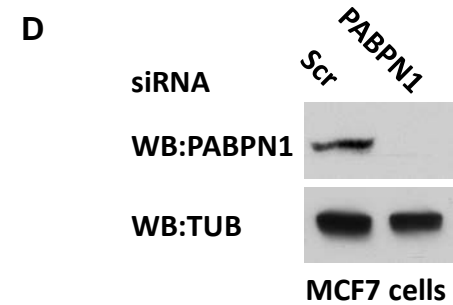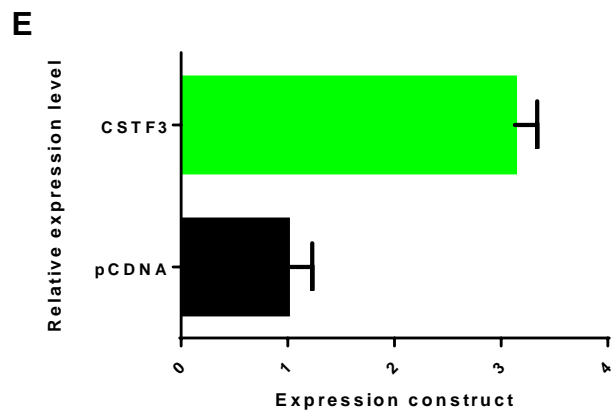

## Supplementary Figure Legends

### Supp Table 1: APA shortened transcripts in Basal-like and Triple-negative breast tumors

(A) List of shortened mRNAs from Basal-like breast tumors. (B) List of shortened mRNAs from Triple-negative breast tumors.

### Supp Table 2: List of primers and siRNAs used in this study

### Supp Fig 1: 3'UTR length variations in an independent cohort of triple-negative breast tumors

(A) Mean and standard deviation of the E2F4 transcript from normal breast tissue and triple-negative breast tumors. (B) RT-PCR results from triple-negative breast tumors of the E2F4 3'UTR (negative control). Expression of the E2F4 coding sequence set to 1. (C) RT-PCR results from normal breast tissue mapping the length of the E2F4 3'UTR. (D) RT-PCR of the FOXO1 mRNA and 3'UTR from triple-negative breast tumors. (E) RT-PCR of the FOXO1 mRNA and 3'UTR from normal breast tissue. (F) RT-PCR of the PTEN mRNA and 3'UTR from triple-negative breast tumors. (G) RT-PCR of the PTEN mRNA and 3'UTR from normal breast tissue. (H) Percentage of triple-negative tumors displaying APA of E2F4, FOXO1 and PTEN.

### Supp Fig 2: Alternative poly-adenylation of the NRAS in Triple-negative breast tumors

(A) RT-PCR results from triple-negative breast tumors which retain a full length NRAS 3'UTR. Expression of the NRAS coding sequence set to 1, only tumors which have more than 50% of UTR region 2 in this collection. (B) Mean and standard deviation of NRAS expression from all of the tumors included in A. (C) RT-PCR results from triple-negative breast tumors which have shortened the NRAS 3'UTR. Expression of the NRAS coding sequence set to 1, only tumors which have less than 50% of UTR region 2 in this collection. (D) Mean and standard deviation of NRAS expression from all of the tumors included in C. (E) RT-PCR results from normal breast tissue mapping the length of the NRAS 3'UTR. (F) Mean and standard deviation of NRAS expression from the normal breast tissue included in E.

### Supp Fig 3: Alternative poly-adenylation of the c-JUN in Triple-negative breast tumors

(A) RT-PCR results from triple-negative breast tumors which retain a full length c-JUN 3'UTR. Expression of the c-JUN coding sequence set to 1, only tumors which have more than 50% of UTR region 2 in this collection. (B) Mean and standard deviation of c-JUN expression from all of the tumors included in A. (C) RT-PCR results from triple-negative breast tumors which have shortened the c-JUN 3'UTR. Expression of the c-JUN coding sequence set to 1, only tumors which have less than 50% of UTR region 2 in this collection. (D) Mean and standard deviation of c-JUN expression from all of the tumors included in C. (E) RT-PCR results from normal breast tissue mapping the length of the c-JUN 3'UTR. (F) Mean and standard deviation of c-JUN expression from the normal breast tissue included in E.

### Supp Fig 4: APA of FOXO1, PTEN and NRAS change their sensitivity to PUM activity.

**(A)** Western blots of PUM1, PUM2, and TUB from MDA-MB-231 cells infected with two independent shRNAs targeting PUM1, PUM2 or Scrambled control sequences. **(B)** mRNA stability assays of the FOXO1 short and long 3'UTR isoforms from MDA-MB-231 cells depleted of PUM1, PUM2 or Scrambled controls sequences. **(C)** mRNA stability assays of the PTEN short and long 3'UTR isoforms from MDA-MB-231 cells depleted of PUM1, PUM2 or Scrambled controls sequences. **(D)** Western blots of PUM1, PUM2, and TUB from MCF7 cells infected with two independent shRNAs targeting PUM1, PUM2 or Scrambled control sequences. **(E)** Luciferase expression levels from MDA-MB-231 cells depleted of PUM1, PUM2 and Scrambled sequences and then transfected with Luciferase constructs containing either the short, long or PRE-mutant 3'UTR isoforms of NRAS. Long isoform in Scramble depleted cells set to 1. (\*\*p=0.01). **(F)** Luciferase expression levels from MCF7 cells depleted of PUM1, PUM2 and Scrambled sequences and then transfected with Luciferase constructs containing either the short, long or PRE-mutant 3'UTR isoforms of NRAS. Long isoform in Scramble depleted cells set to 1. (\*\*p=0.01).

**Supp Fig 5: APA of FOXO1, PTEN and NRAS change their sensitivity to PUM activity.**

**(A)** mRNA stability assays of the NRAS short and long 3'UTR isoforms from MDA-MB-231 cells depleted of PUM1, PUM2 or Scrambled controls sequences. **(B)** mRNA stability assays of the c-JUN short and long 3'UTR isoforms from MDA-MB-231 cells depleted of PUM1, PUM2 or Scrambled controls sequences.

**Supp Figure 6: Pumilio does not affect alternative poly-adenylation status of candidate substrates.**

**(A)** 3'RACE RT-PCR of FAM110, NRAS, c-JUN and TMEM119 from MCF10a cells depleted of PUM1, PUM2, PABPN1 or Scrambled control sequences by shRNA. Distal APA site divided by proximal site from Scrambled treated cells set to 0. **(B)** 3'RACE RT-PCR of FAM110, NRAS, c-JUN and TMEM119 from MCF7 cells depleted of PUM1, PUM2, PABPN1 or Scrambled control sequences by shRNA. Distal APA site divided by proximal site from Scrambled treated cells set to 0. **(C)** Western blots of PUM1, PUM2, PABPN1 and TUB from MCF10a cells treated with shRNAs or siRNAs targeting PUM, PABPN1 or Scrambled control sequences. **(D)** Western blots of PABPN1 and TUB from MCF7 cells treated with siRNAs targeting PABPN1 or Scrambled control sequences. **(E)** RT-qPCR results from RPE cells transfected an empty control vector (pCDNA) or one containing CSTF3.
